# Supplementary material for: Simultaneous inhibition of multiple oncogenic miRNAs by a multi-potent microRNA sponge
Source: PubMed Central journal article supplement (PMC4653011; doi:10.18632/oncotarget.4827), 2015-07-30
Supplement: oncotarget-06-20370-s001.pdf [file oncotarget-06-20370-s001.pdf]

SUPPLEMENTARY FIGURES AND TABLES

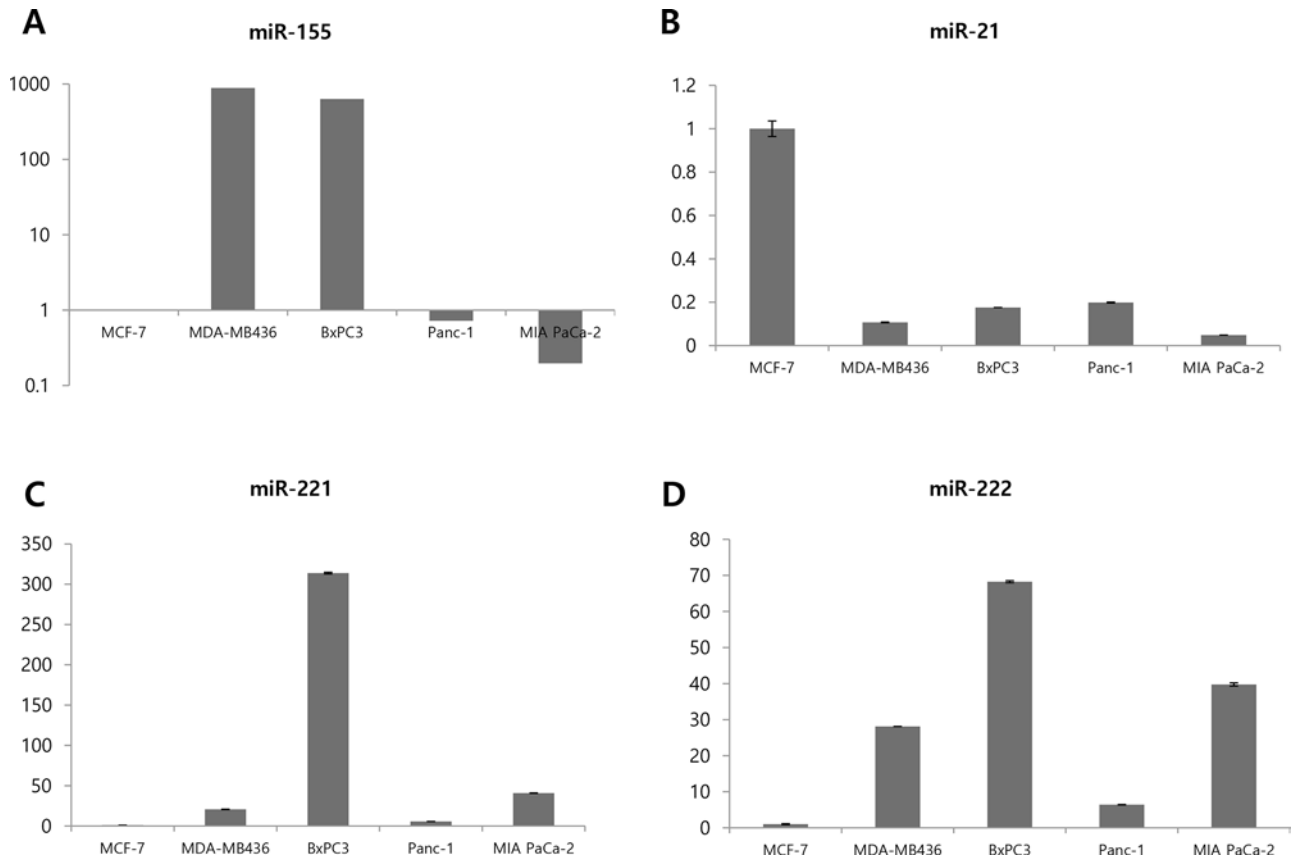

**Supplementary Figure S1: Endogenous level of the four targeted miRNAs in breast and pancreatic cancer cells.** The level of each miRNA was measured by real time PCR and indicated as relative value to the level in MCF7 cell. **A.** miR-155, **B.** miR-21, **C.** miR-222, **D.** miR-221

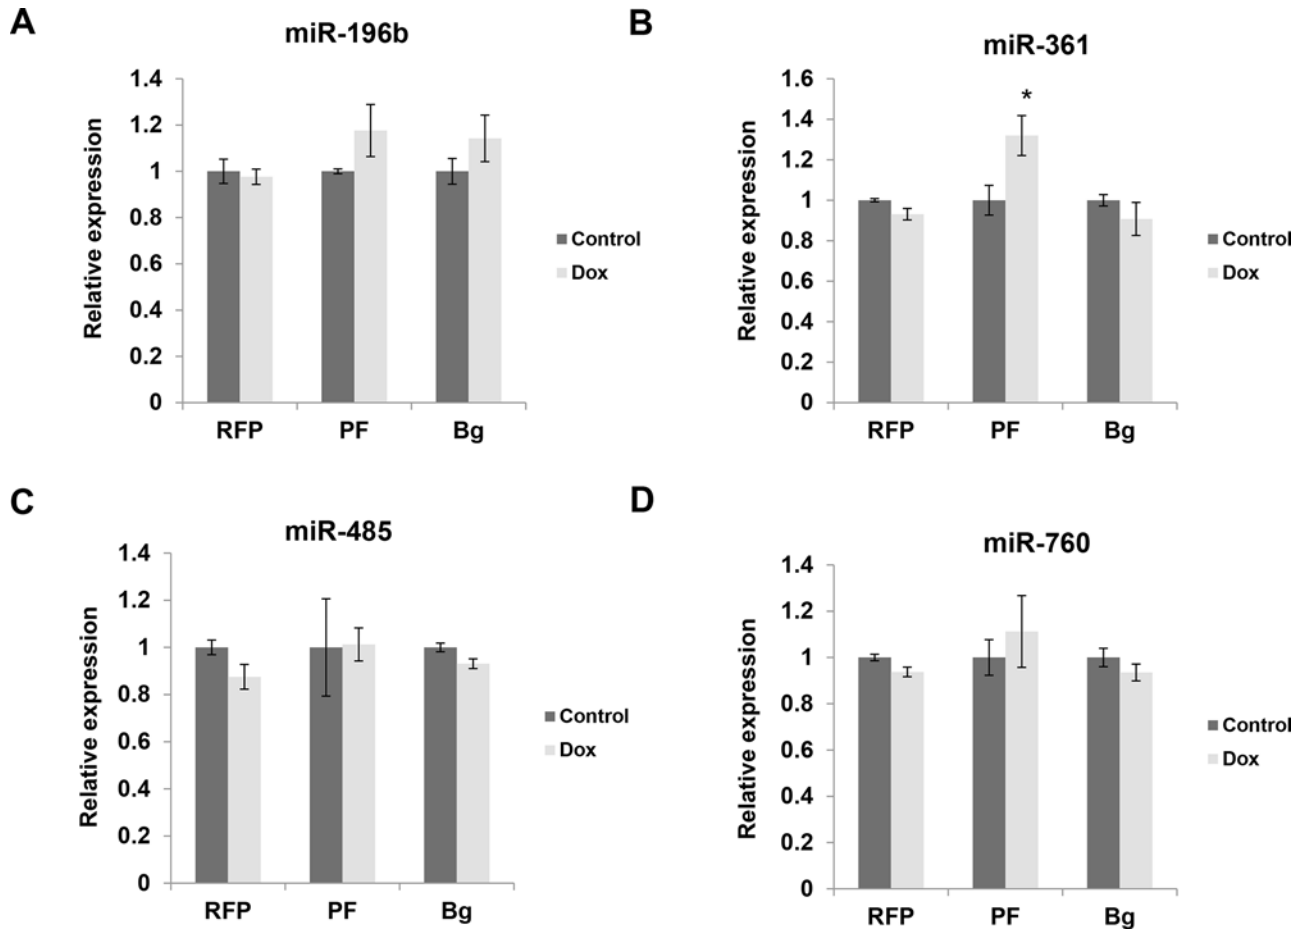

**Supplementary Figure S2: Marginal non-specific inhibition by the multi-potent miRNA sponge.** Real time-PCR quantification of the four miRNAs, which were predicted to have relatively high-affinity to the miRNA sponge. Note that marginal expression change of the four non-specific miRNAs by the expression of the miRNA sponge (PF: Perfect matched, Bg: Bulged).

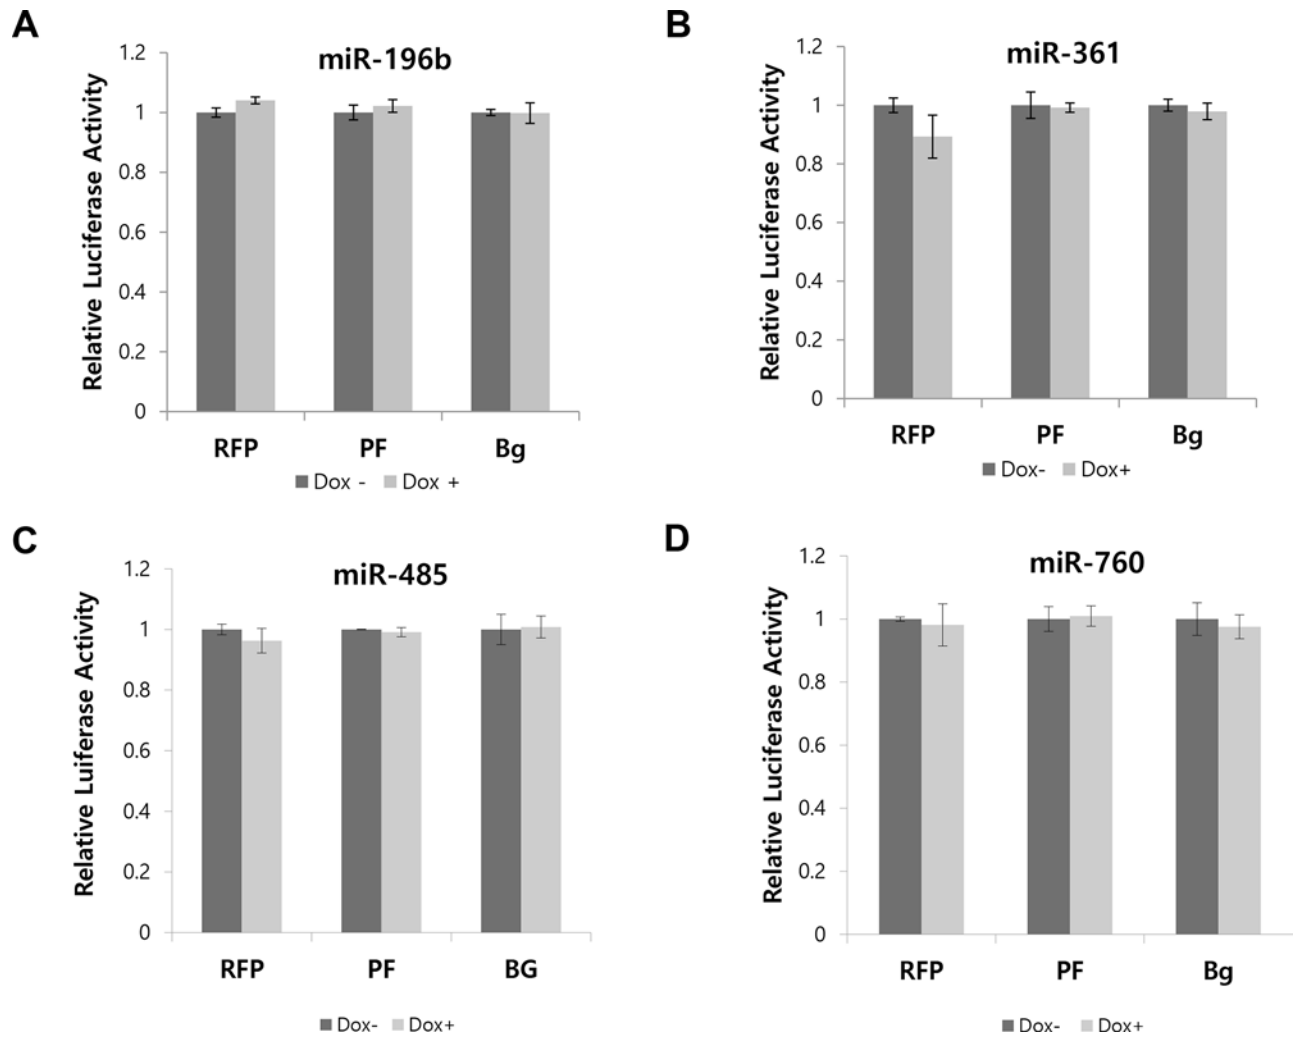

Supplementary Figure S3: Luciferase reporter assay for each miRNA, which were predicted to have relatively high-affinity to the miRNA sponge. (PF: Perfect matched, Bg: Bulged, Dox-: no doxycycline treatment, Dox+: doxycycline treatment).

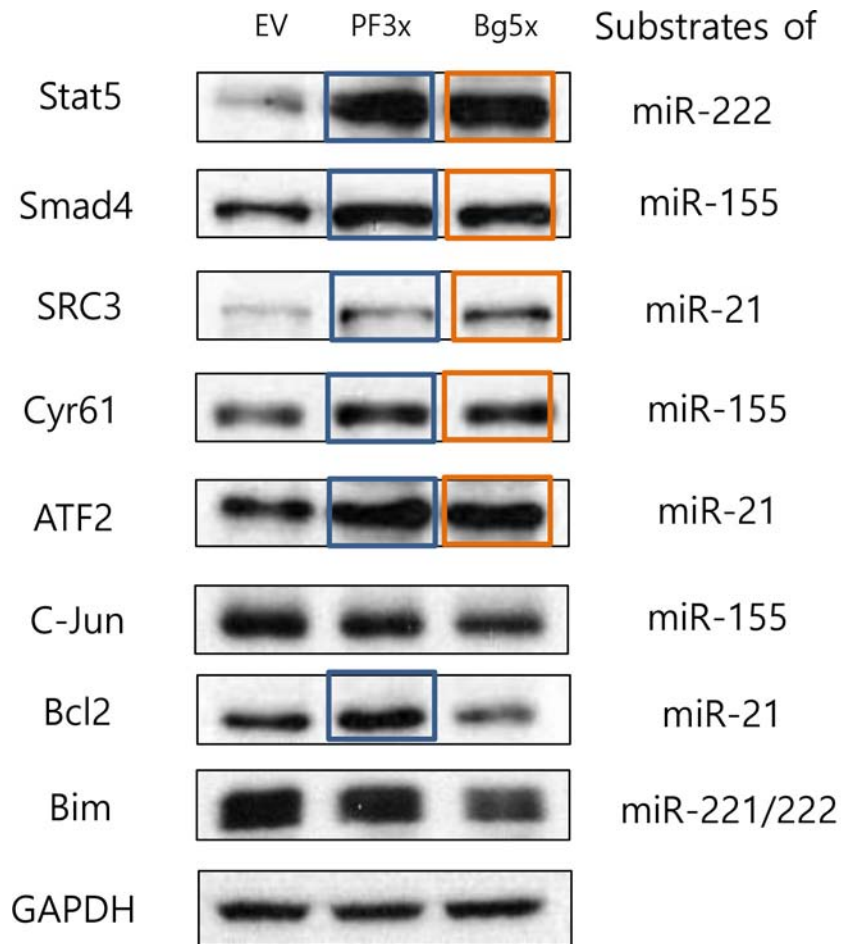

**Supplementary Figure S4: Western blotting analysis of target proteins, which were shown in figure 4J.** The protein levels were analyzed in MDA-MB-436 cell after transfection of perfect 3x or bulged 5x sponge DNA plasmids. Boxes indicate targets that showed increased protein level after expression of sponge.

**Supplementary Table S1. Primer sequences used in this study**

| Primer Name                                          | Sequences                                                                                                           |
|------------------------------------------------------|---------------------------------------------------------------------------------------------------------------------|
| 1-Perfect_miR155_21_221222-SP_S                      | 5'-GTC CCA CCC CTA TCA CGA TTA GCA TTA AAA<br>TTT CAA CAT CAG TCT GAT AAG CTA AAT TAC<br>CCA GAG CAA TGT AGC TGG-3' |
| 2-Perfect_miR155_21_221222-SP_AS-1                   | 5'-GAC CCA GCT ACA TTG CTC TGG GTA ATT TAG<br>CTT ATC AGA CTG ATG TTG AAA TTT TAA TGC<br>TAA TCG TGA TAG GGG TGG-3' |
| 3-Bulged_miR155_21_221222-SP_S                       | 5'-GTC CCA TTT TGT TTT AGC ATT AAA ATT TCA<br>ACA TCA GGA CAT AAG CTA AAT TAC CCA GCC<br>TAT GTA GCT GG-3'          |
| 4-Bulged_miR155_21_221222-SP_AS-1                    | 5'-GAC CCA GCT ACA TAG GCT GGG TAA TTT AGC<br>TTA TGT CCT GAT GTT GAA ATT TTA ATG CTA<br>AAA CAA AAT GG-3'          |
| 5-Linker_SpeI_EcoO109I_SanDI_<br>EcoO109I_HindIII_S  | 5'-CTA GTA GGG CCC GGG TCC CAG GGC CCA-3'                                                                           |
| 6-Linker_SpeI_EcoO109I_<br>SanDIEcoO109IHindIII_AS-1 | 5'-AGC TTG GGC CCT GGG ACC CGG GCC CTA-3'                                                                           |
| miR-155_rep_SanDI_For                                | 5'-GTC CCA CCC CTA TCA CGA TTA GCA TTA AGG-3'                                                                       |
| miR-155_rep_SanDI_Rev                                | 5'-GAC CCT TAA TGC TAA TCG TGA TAG GGG TGG-3'                                                                       |
| miR-21_rep_SanDI_For                                 | 5'-GTC CCT CAA CAT CAG TCT GAT AAG CTA GG-3'                                                                        |
| miR-21_rep_SanDI_Rev                                 | 5'-GAC CCT AGC TTA TCA GAC TGA TGT TGA GG-3'                                                                        |
| miR-221_rep_SanDI_For                                | 5'-GTC CCG AAA CCC AGC AGA CAA TGT AGC TGG-3'                                                                       |
| miR-221_rep_SanDI_Rev                                | 5'-GAC CCA GCT ACA TTG TCT GCT GGG TTT CGG-3'                                                                       |
| miR-222_rep_SanDI_For                                | 5'-GTC CCA CCC AGT AGC CAG ATG TAG CTG G-3'                                                                         |
| miR-222_rep_SanDI_Rev                                | 5'-GAC CCA GCT ACA TCT GGC TAC TGG GTG G-3'                                                                         |
| miR-196_SpeI_For                                     | 5'-CTA GTT AGG TAG TTT CCT GTT GTT GGG A-3'                                                                         |
| miR-196_HindIII_Rev                                  | 5'-AGC TTC CCA ACA ACA GGA AAC TAC CTA A-3'                                                                         |
| miR-361_SpeI_For                                     | 5'-CTA GTT TAT CAG AAT CTC CAG GGG TAC A-3'                                                                         |
| miR-361_HindIII_Rev                                  | 5'-AGC TTG TAC CCC TGG AGA TTC TGA TAA A-3'                                                                         |
| miR-485_SpeI_For                                     | 5'-CTA GTA GAG GCT GGC CGT GAT GAA TTC A-3'                                                                         |
| miR-485_HindIII_Rev                                  | 5'-AGC TTG AAT TCA TCA CGG CCA GCC TCT A-3'                                                                         |
| miR-760_SpeI_For                                     | 5'-CTA GTC GGC TCT GGG TCT GTG GGG AA-3'                                                                            |
| miR-760_HindIII_Rev                                  | 5'-AGC TTT CCC CAC AGA CCC AGA GCC GA-3'                                                                            |
| miR-222_SpeI_For                                     | 5'-CTA GTC TCA GTA GCC AGT GTA GAT CCT A-3'                                                                         |
| miR-222_HindIII_Rev                                  | 5'-AGC TTA GGA TCT ACA CTG GCT ACT GAG A-3'                                                                         |
| Ago2 RNA IP real time PCR primer                     | 5'-TTG GTT ACG GGG CCC CTG GG-3'                                                                                    |
|                                                      | 5'-GCG CCT AGA GGG CCC GGG TC-3'                                                                                    |

**Supplementary Table S2. miRNA sequences targeted in this study obtained from miRBase**

| miRNA   | miRBase ID   | sequence(s)             |
|---------|--------------|-------------------------|
| miR-155 | MIMAT0000646 | uuaaugcuaaucgugauaggggu |
| miR-21  | MIMAT0000076 | uagcuuauacagacugauguuga |
| miR-221 | MIMAT0000278 | agcuacauugucugcuggguuuc |
| miR-222 | MIMAT0000279 | agcuacaucuggcuacugggu   |

(www.mirbase.org)
